# Supplementary material
Source: publisher site journal article supplement (https://www.dovepress.com/article/288579)

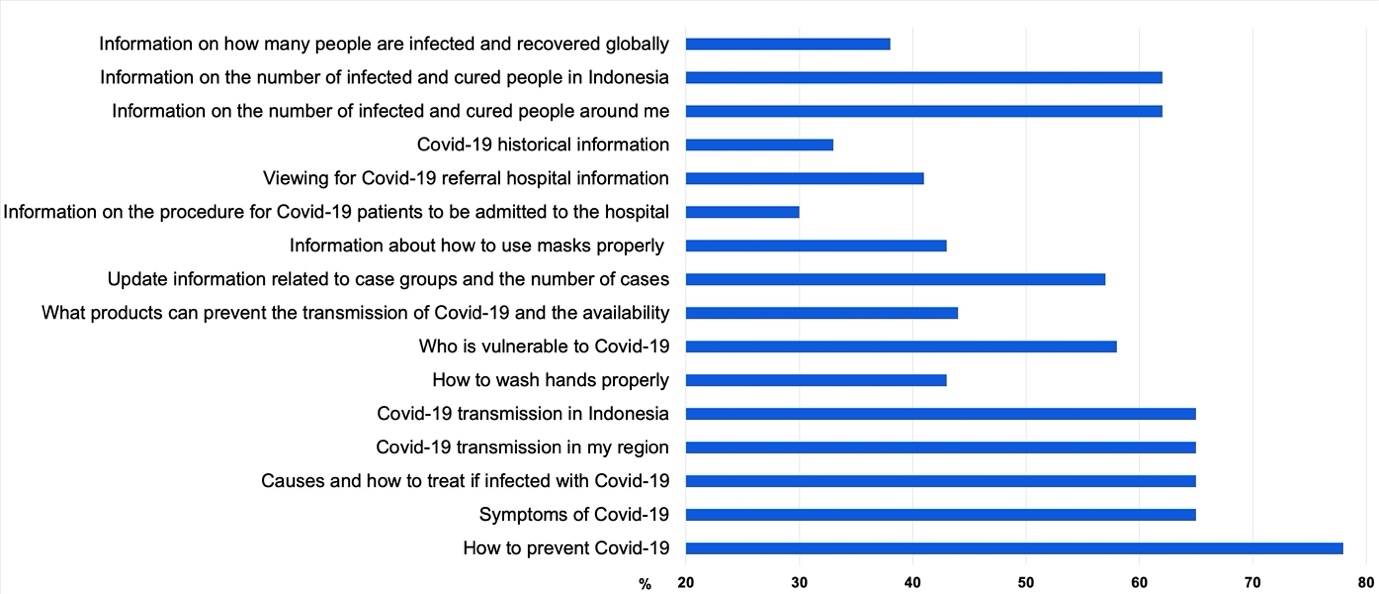


**Figure S1**. The type of information sought during the COVID-19 pandemic (N=816).

Supplement: Supplementary file 1 [file get_supplementary_file.php]
